# Supplementary material for: Shape-Tunable UV-Printed Solid Drugs for Personalized Medicine
Source: MDPI journal article supplement (doi:10.3390/polym14132714), 2022-07-02
Supplement: s1 [file s1]

Supplementary material

# Shape tunable UV-printed solid drugs for personalized medicine

Bobby Aditya Darmawan<sup>1,2</sup>, Sang Bong Lee<sup>3</sup>, Minghui Nan<sup>1,2</sup>, Van Du Nguyen<sup>1,2</sup>, Jong-Oh Park<sup>2,\*</sup> and Eunpyo Choi<sup>1,2,\*</sup>

<sup>1</sup> School of Mechanical Engineering, Chonnam National University, 77 Yongbong-ro, Buk-gu, Gwangju 61186, South Korea; bobbyaditdit@gmail.com (B.A.D.); myeonghea94@kimiro.re.kr (M.N.); nvdu81@gmail.com (V.D.N)

<sup>2</sup> Korea Institute of Medical Microrobotics, 43-26, Cheomdangwagi-ro 208-beon-gil, Buk-gu, Gwangju 61011, South Korea;

<sup>3</sup> THERABEST, Co., Ltd., Seocho-daero 40-gil, Seoul 06657, Korea; sblee@therabest.co.kr (S.B.L.)

\* Correspondence: jop@kimiro.re.kr (J-OP); eunpyochoi@jnu.ac.kr (E.C.)

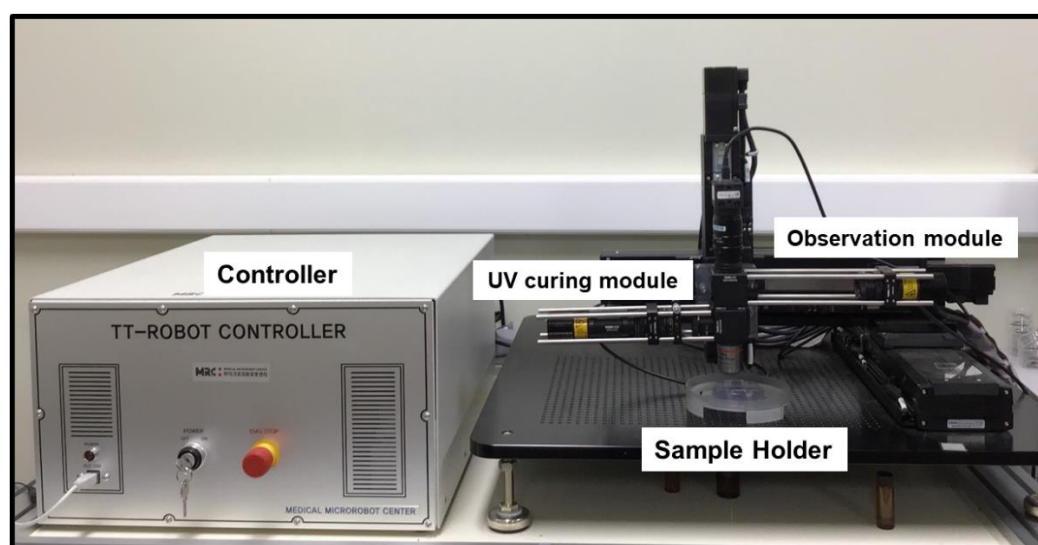

**Figure S1.** Optical system that was used in this study

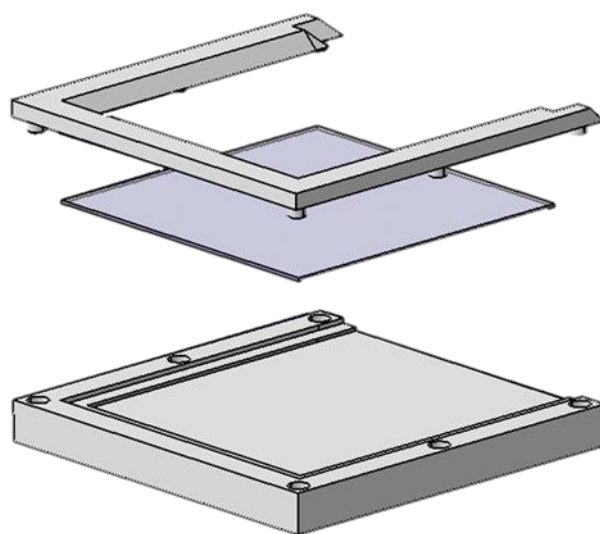

**Figure S2.** Illustration of the 3D-printed microchamber

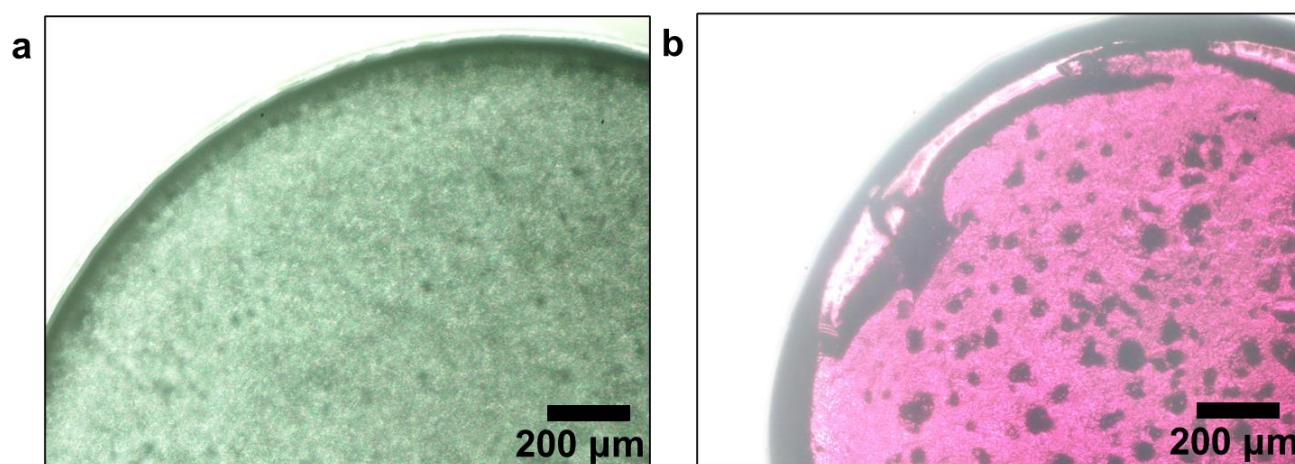

**Figure S3.** The optical microscope of (a) PEGDA (b) solid drugs

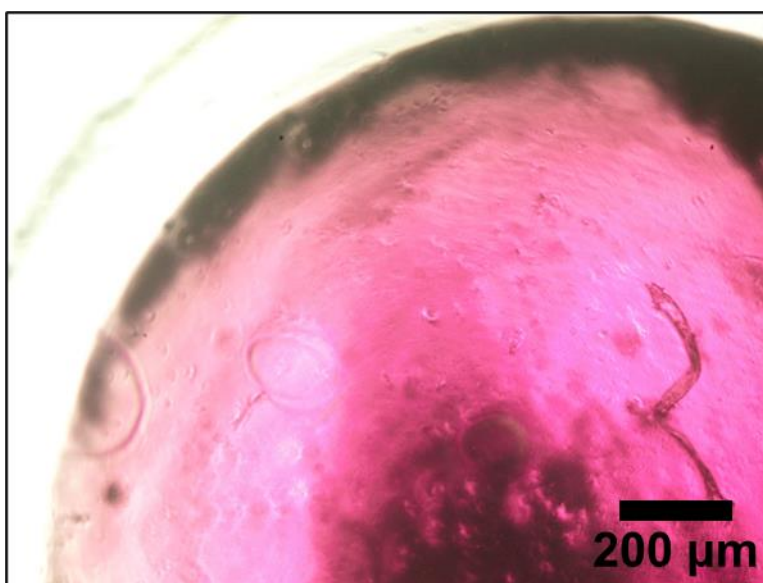

**Figure S4.** The optical microscope of the patterned solid drugs based on Sorbitol diacrylate

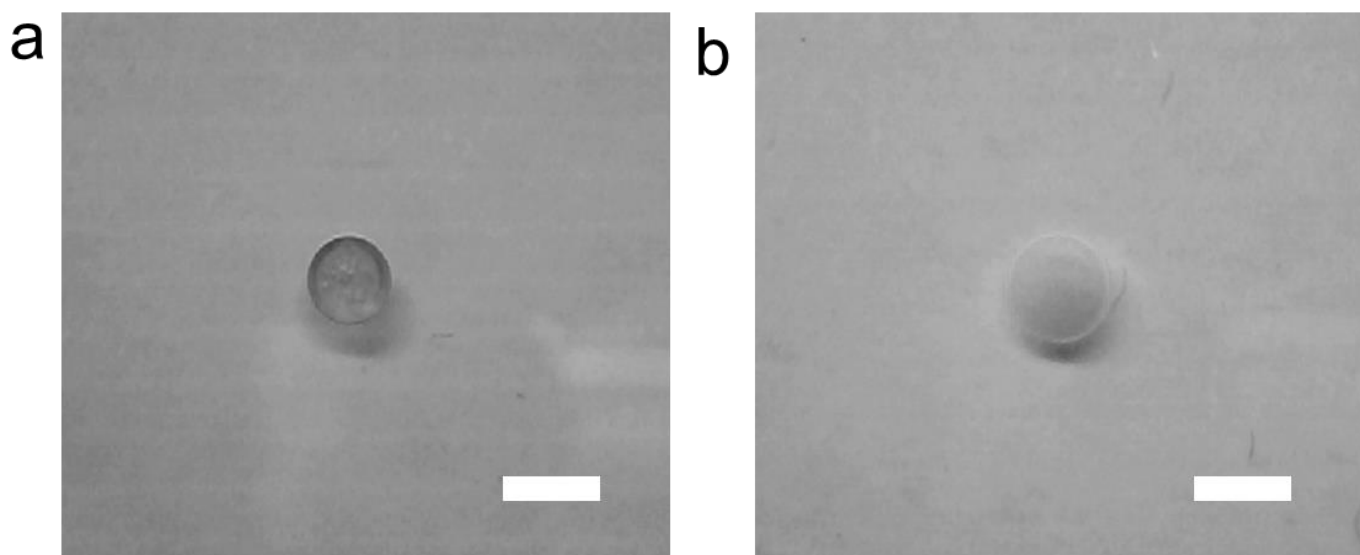

**Figure S5.** The digital images of the (a) dried sample and (b) swollen sample of the solid drugs with 30 s exposure time (scale bar: 2 mm).

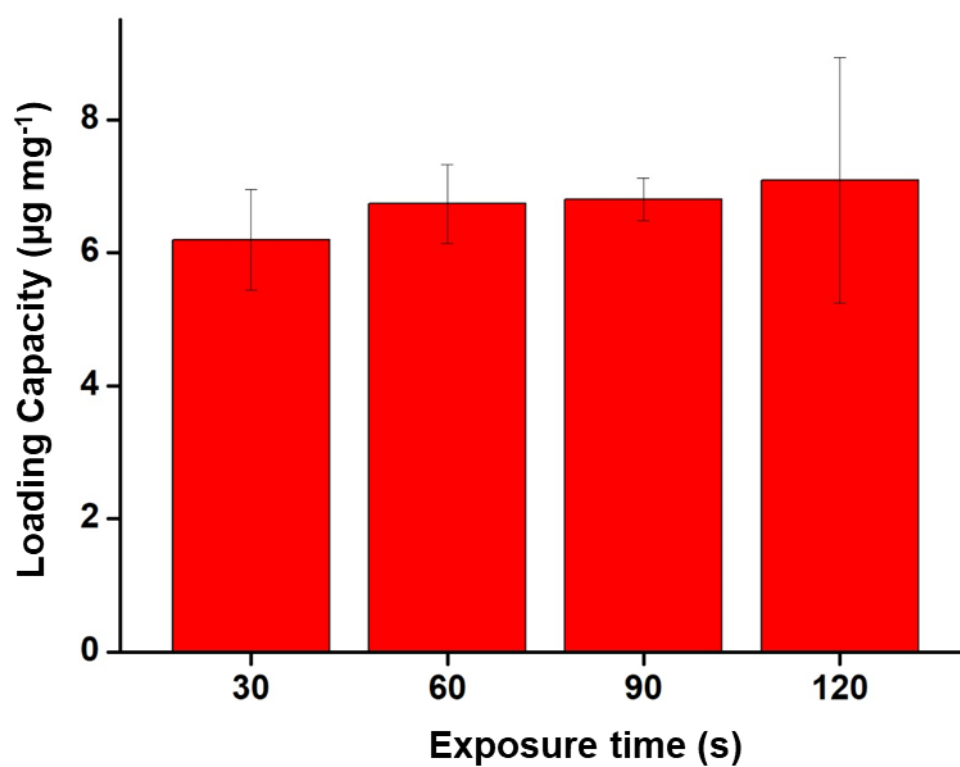

**Figure S6.** The drug loading capacity of the solid drugs.

**Table S1.** Volume of the patterned geometry

| Shape       | Volume<br>(mm <sup>3</sup> ) |
|-------------|------------------------------|
| Round       | 0.739432                     |
| Square      | 0.81446                      |
| Rectangular | 1.042903                     |
| Triangle    | 1.166614                     |
